# Supplementary material for: Metabolic Status Influences Probiotic Efficacy for Depression—PRO-DEMET Randomized Clinical Trial Results
Source: MDPI journal article supplement (doi:10.3390/nu16091389), 2024-05-03
Supplement: s1 [file s1]

1. Basal psychopathology scores in the PRO group depend on antidepressant treatment.

| Aggregate Results<br>Descriptive Statistics (Spreadsheet2_(Recovered) 5.01.2024)<br>Include condition: v1="pro" |                 |         |          |          |          |           |
|-----------------------------------------------------------------------------------------------------------------|-----------------|---------|----------|----------|----------|-----------|
| Variable                                                                                                        | Antidepressants | Valid N | Mean     | Minimum  | Maximum  | Std. Dev. |
| V1 MADRS                                                                                                        | yes             | 36      | 20.16667 | 13.00000 | 43.0000  | 6.48735   |
| V1 DASS                                                                                                         | yes             | 35      | 58.97143 | 16.00000 | 100.0000 | 22.40468  |
| V1 D-DASS                                                                                                       | yes             | 35      | 18.65714 | 3.00000  | 37.0000  | 10.05848  |
| V1 A-DASS                                                                                                       | yes             | 35      | 16.88571 | 1.00000  | 38.0000  | 9.61240   |
| V1 S-DASS                                                                                                       | yes             | 35      | 23.42857 | 8.00000  | 42.0000  | 8.56561   |
| V1 MADRS sadness                                                                                                | yes             | 32      | 4.34375  | 1.00000  | 7.0000   | 1.78902   |
| V1 MADRS neurovegetative                                                                                        | yes             | 32      | 5.46875  | 0.00000  | 10.0000  | 2.24304   |
| V1 MADRS detachment                                                                                             | yes             | 32      | 6.84375  | 0.00000  | 10.0000  | 2.47711   |
| V1 MADRS negative thoughts                                                                                      | yes             | 32      | 3.00000  | 1.00000  | 8.0000   | 1.50269   |
| V1 MADRS                                                                                                        | no              | 15      | 22.80000 | 16.00000 | 29.0000  | 4.61674   |
| V1 DASS                                                                                                         | no              | 15      | 74.40000 | 37.00000 | 106.0000 | 17.92365  |
| V1 D-DASS                                                                                                       | no              | 15      | 25.60000 | 7.00000  | 40.0000  | 10.07685  |
| V1 A-DASS                                                                                                       | no              | 15      | 20.06667 | 4.00000  | 30.0000  | 6.88131   |
| V1 S-DASS                                                                                                       | no              | 15      | 28.73333 | 17.00000 | 37.0000  | 7.10600   |
| V1 MADRS sadness                                                                                                | no              | 15      | 4.66667  | 2.00000  | 7.0000   | 1.44749   |
| V1 MADRS neurovegetative                                                                                        | no              | 15      | 6.86667  | 2.00000  | 10.0000  | 2.13363   |
| V1 MADRS detachment                                                                                             | no              | 15      | 7.66667  | 2.00000  | 11.0000  | 2.16025   |
| V1 MADRS negative thoughts                                                                                      | no              | 15      | 3.53333  | 2.00000  | 5.0000   | 1.06010   |

| Aggregate Results<br>Mann-Whitney U Test (w/ continuity correction) (Spreadsheet2_(Recovered) 5.01.2024)<br>Biv. variable Antidepressants |                    |             |              |          |          |          |            |          |            |             |                  |
|-------------------------------------------------------------------------------------------------------------------------------------------|--------------------|-------------|--------------|----------|----------|----------|------------|----------|------------|-------------|------------------|
| variable                                                                                                                                  | Prob/otic/pl acebo | Rank Sum no | Rank Sum yes | U        | Z        | p-value  | Z adjusted | p-value  | Valid N no | Valid N yes | 2*1sided exact p |
| V1 MADRS                                                                                                                                  | plc                | 343.0000    | 603.0000     | 168.0000 | 0.894171 | 0.371231 | 0.898832   | 0.368743 | 14         | 29          | 0.375697         |
| V1 DASS                                                                                                                                   | plc                | 338.0000    | 565.0000     | 159.0000 | 0.973882 | 0.330116 | 0.974356   | 0.329881 | 14         | 28          | 0.334373         |
| V1 D-DASS                                                                                                                                 | plc                | 316.5000    | 586.5000     | 180.5000 | 0.400225 | 0.688991 | 0.400908   | 0.688488 | 14         | 28          | 0.682813         |
| V1 A-DASS                                                                                                                                 | plc                | 315.0000    | 588.0000     | 182.0000 | 0.360203 | 0.718696 | 0.361302   | 0.717874 | 14         | 28          | 0.721960         |
| V1 S-DASS                                                                                                                                 | plc                | 364.5000    | 538.5000     | 132.5000 | 1.680947 | 0.092774 | 1.682583   | 0.092457 | 14         | 28          | 0.090394         |
| V1 MADRS sadness                                                                                                                          | plc                | 343.0000    | 560.0000     | 154.0000 | 1.107290 | 0.268169 | 1.126958   | 0.259761 | 14         | 28          | 0.271830         |
| V1 MADRS neurove                                                                                                                          | plc                | 323.5000    | 579.5000     | 173.5000 | 0.586997 | 0.557206 | 0.596598   | 0.550776 | 14         | 28          | 0.552761         |
| V1 MADRS detachn                                                                                                                          | plc                | 318.5000    | 584.5000     | 178.5000 | 0.453589 | 0.650125 | 0.459185   | 0.646101 | 14         | 28          | 0.644482         |
| V1 MADRS negative                                                                                                                         | plc                | 319.5000    | 583.5000     | 177.5000 | 0.480270 | 0.631035 | 0.491866   | 0.622815 | 14         | 28          | 0.625648         |
| V1 MADRS                                                                                                                                  | pro                | 847.0000    | 479.0000     | 181.0000 | -1.82951 | 0.067324 | -1.83304   | 0.066797 | 36         | 15          | 0.066949         |
| V1 DASS                                                                                                                                   | pro                | 790.0000    | 485.0000     | 160.0000 | -2.15936 | 0.030823 | -2.16025   | 0.030754 | 35         | 15          | 0.029708         |
| V1 D-DASS                                                                                                                                 | pro                | 792.0000    | 483.0000     | 162.0000 | -2.11702 | 0.034259 | -2.12110   | 0.033914 | 35         | 15          | 0.033193         |
| V1 A-DASS                                                                                                                                 | pro                | 829.5000    | 445.5000     | 199.5000 | -1.32314 | 0.185790 | -1.32610   | 0.184806 | 35         | 15          | 0.184383         |
| V1 S-DASS                                                                                                                                 | pro                | 802.0000    | 473.0000     | 172.0000 | -1.90532 | 0.056739 | -1.90849   | 0.056329 | 35         | 15          | 0.056118         |
| V1 MADRS sadness                                                                                                                          | pro                | 748.5000    | 379.5000     | 220.5000 | -0.43361 | 0.664569 | -0.44103   | 0.659190 | 32         | 15          | 0.659802         |
| V1 MADRS neurove                                                                                                                          | pro                | 681.0000    | 447.0000     | 153.0000 | -1.97408 | 0.048373 | -1.99749   | 0.045773 | 32         | 15          | 0.047553         |
| V1 MADRS detachn                                                                                                                          | pro                | 726.0000    | 402.0000     | 198.0000 | -0.94710 | 0.343587 | -0.95853   | 0.337795 | 32         | 15          | 0.347578         |
| V1 MADRS negative                                                                                                                         | pro                | 698.0000    | 430.0000     | 170.0000 | -1.58611 | 0.112715 | -1.65371   | 0.098188 | 32         | 15          | 0.113415         |

2. Basal MADRS and DASS score, or antidepressant use in the PRO group depending on abdominal obesity or HSI>36 presence.

| Aggregate Results<br>Mann-Whitney U Test (w/ continuity correction) (Spreadsheet2_(Recovered) 5.01.2024)<br>By variable WC 2022<br>Marked tests are significant at p < 05000 |                   |                |                 |          |          |          |               |          |               |                |                     |
|------------------------------------------------------------------------------------------------------------------------------------------------------------------------------|-------------------|----------------|-----------------|----------|----------|----------|---------------|----------|---------------|----------------|---------------------|
| variable                                                                                                                                                                     | Probiotic/placebo | Rank Sum<br>no | Rank Sum<br>yes | U        | Z        | p-value  | Z<br>adjusted | p-value  | Valid N<br>no | Valid N<br>yes | 2*1sided<br>exact p |
| V1 MADRS                                                                                                                                                                     | pro               | 389.0000       | 937.0000        | 236.0000 | -1.04902 | 0.294169 | -1.05104      | 0.293239 | 17            | 34             | 0.297401            |
| V1 DASS                                                                                                                                                                      | pro               | 434.0000       | 841.0000        | 280.0000 | 0.00000  | 1.000000 | 0.00000       | 1.000000 | 17            | 33             | 1.000000            |
| V1 D-DASS                                                                                                                                                                    | pro               | 444.0000       | 830.0000        | 269.0000 | 0.21504  | 0.829739 | 0.21545       | 0.829416 | 17            | 33             | 0.823568            |
| V1 A-DASS                                                                                                                                                                    | pro               | 472.0000       | 803.0000        | 242.0000 | 0.77823  | 0.436434 | 0.77997       | 0.435407 | 17            | 33             | 0.440305            |
| V1 S-DASS                                                                                                                                                                    | pro               | 364.0000       | 911.0000        | 211.0000 | -1.41310 | 0.157627 | -1.41545      | 0.156938 | 17            | 33             | 0.159124            |
| V1 MADRS sadness                                                                                                                                                             | pro               | 364.0000       | 763.0000        | 211.0000 | -0.95204 | 0.341079 | -0.96832      | 0.332883 | 17            | 30             | 0.339135            |
| V1 MADRS neurovegetative                                                                                                                                                     | pro               | 379.0000       | 748.0000        | 226.0000 | -0.61993 | 0.535304 | -0.62728      | 0.530475 | 17            | 30             | 0.531909            |
| V1 MADRS detachment                                                                                                                                                          | pro               | 384.0000       | 744.0000        | 231.0000 | -0.52030 | 0.602856 | -0.52658      | 0.598487 | 17            | 30             | 0.606414            |
| V1 MADRS negative thoughts                                                                                                                                                   | pro               | 365.0000       | 762.0000        | 212.0000 | -0.92990 | 0.352426 | -0.96952      | 0.332285 | 17            | 30             | 0.350427            |

| Aggregate Results<br>Mann-Whitney U Test (w/ continuity correction) (Spreadsheet2_(Recovered) 5.01.2024)<br>By variable HSI>36 yes/no<br>Marked tests are significant at p < 0.05000 |                   |                |                 |          |           |          |               |          |               |                |                     |
|--------------------------------------------------------------------------------------------------------------------------------------------------------------------------------------|-------------------|----------------|-----------------|----------|-----------|----------|---------------|----------|---------------|----------------|---------------------|
| variable                                                                                                                                                                             | Probiotic/placebo | Rank Sum<br>no | Rank Sum<br>yes | U        | Z         | p-value  | Z<br>adjusted | p-value  | Valid N<br>no | Valid N<br>yes | 2*1sided<br>exact p |
| V1 MADRS                                                                                                                                                                             | pro               | 1075.500       | 250.5000        | 195.5000 | 0.213520  | 0.830921 | 0.213932      | 0.830600 | 41            | 10             | 0.824420            |
| V1 DASS                                                                                                                                                                              | pro               | 1021.500       | 253.5000        | 198.5000 | 0.024254  | 0.980650 | 0.024263      | 0.980642 | 40            | 10             | 0.971440            |
| V1 D-DASS                                                                                                                                                                            | pro               | 1005.500       | 269.5000        | 185.5000 | -0.339550 | 0.734196 | -0.340204     | 0.733703 | 40            | 10             | 0.729117            |
| V1 A-DASS                                                                                                                                                                            | pro               | 1005.500       | 269.5000        | 185.5000 | -0.339550 | 0.734196 | -0.340311     | 0.733623 | 40            | 10             | 0.729117            |
| V1 S-DASS                                                                                                                                                                            | pro               | 1067.500       | 207.5000        | 152.5000 | 1.139917  | 0.254322 | 1.141811      | 0.253534 | 40            | 10             | 0.253646            |
| V1 MADRS sadness                                                                                                                                                                     | pro               | 873.000        | 255.0000        | 170.0000 | -0.376910 | 0.706241 | -0.383358     | 0.701454 | 37            | 10             | 0.710533            |
| V1 MADRS neurovegetative                                                                                                                                                             | pro               | 885.000        | 243.0000        | 182.0000 | -0.064984 | 0.948186 | -0.065755     | 0.947573 | 37            | 10             | 0.949014            |
| V1 MADRS detachment                                                                                                                                                                  | pro               | 880.000        | 248.0000        | 177.0000 | -0.194953 | 0.845430 | -0.197306     | 0.843588 | 37            | 10             | 0.847846            |
| V1 MADRS negative thoughts                                                                                                                                                           | pro               | 913.000        | 215.0000        | 160.0000 | 0.636847  | 0.524225 | 0.663987      | 0.506699 | 37            | 10             | 0.530037            |

| Probiotic/placebo | Antidepressants | HSI>36 yes/no<br>no | HSI>36 yes/no<br>yes | Row<br>Totals |
|-------------------|-----------------|---------------------|----------------------|---------------|
| plc no            |                 | 13                  | 1                    | 14            |
| plc yes           |                 | 17                  | 13                   | 30            |
| plc All Grps      |                 | 30                  | 14                   | 44            |
| pro yes           |                 | 9                   | 27                   | 36            |
| pro no            |                 | 1                   | 14                   | 15            |
| pro All Grps      |                 | 10                  | 41                   | 51            |

PRO: The chi-square statistic is 2.2577. The  $p$ -value is .132953. The result is *not* significant at  $p < .05$ .

| Include condition: v1="pro" |                       |                        |               |
|-----------------------------|-----------------------|------------------------|---------------|
| WC 2022                     | Antidepressants<br>no | Antidepressants<br>yes | Row<br>Totals |
| no                          | 12                    | 22                     | 34            |
| yes                         | 3                     | 14                     | 17            |
| All Grps                    | 15                    | 36                     | 51            |

The chi-square statistic is 1.7. The  $p$ -value is .192288. The result is *not* significant at  $p < .05$ .

### 3. Correlation analysis of basal psychometric and metabolic data.

| All Groups<br>Correlations (Spreadsheet2_(Recovered) 5.01.2024)<br>Marked correlations are significant at p < .05000<br>N=87 (Casewise deletion of missing data) |           |           |           |           |           |                  |                          |                     |                            |
|------------------------------------------------------------------------------------------------------------------------------------------------------------------|-----------|-----------|-----------|-----------|-----------|------------------|--------------------------|---------------------|----------------------------|
| Variable                                                                                                                                                         | V1 MADRS  | V1 DASS   | V1 D-DASS | V1 A-DASS | V1 S-DASS | V1 MADRS sadness | V1 MADRS neurovegetative | V1 MADRS detachment | V1 MADRS negative thoughts |
| V1 BMI [kg/m2]                                                                                                                                                   | -0.001363 | 0.058847  | 0.178982  | 0.067991  | -0.111485 | 0.020791         | -0.038799                | 0.006601            | -0.055551                  |
| V1 WC [cm]                                                                                                                                                       | 0.003885  | 0.046282  | 0.132750  | 0.093090  | -0.116433 | 0.028398         | -0.093595                | 0.074386            | -0.121303                  |
| V1 AST                                                                                                                                                           | 0.079293  | -0.144101 | -0.096126 | -0.154609 | -0.101983 | 0.169614         | -0.012366                | 0.020457            | 0.106702                   |
| V1 ALT                                                                                                                                                           | -0.025974 | -0.150218 | -0.094121 | -0.118246 | -0.153173 | 0.112573         | -0.066820                | -0.076352           | -0.029680                  |
| AST/ALT                                                                                                                                                          | 0.079293  | -0.144101 | -0.096126 | -0.154609 | -0.101983 | 0.169614         | -0.012366                | 0.020457            | 0.106702                   |
| V1 sBP [mmHg]                                                                                                                                                    | 0.094618  | -0.091041 | -0.017454 | -0.048963 | -0.156284 | 0.079280         | 0.007670                 | 0.001165            | 0.109853                   |
| V1 dBP [mmHg]                                                                                                                                                    | 0.187061  | 0.012286  | 0.069421  | 0.074861  | -0.114438 | 0.187498         | 0.026995                 | 0.097349            | 0.206173                   |
| V1 fGlc [mmol/l]                                                                                                                                                 | 0.176602  | 0.004089  | 0.112830  | 0.018364  | -0.127325 | 0.089343         | 0.135160                 | 0.125448            | 0.030290                   |
| V1 TG                                                                                                                                                            | -0.011872 | -0.051887 | 0.104647  | -0.090882 | -0.151664 | 0.101852         | -0.076864                | 0.021208            | -0.165300                  |
| V1 TG [mg/dl]                                                                                                                                                    | -0.011872 | -0.051887 | 0.104647  | -0.090882 | -0.151664 | 0.101852         | -0.076864                | 0.021208            | -0.165300                  |
| V1 HDL [mmol/l]                                                                                                                                                  | -0.305562 | -0.127200 | -0.282654 | -0.069396 | 0.057183  | -0.245066        | -0.178171                | -0.257789           | -0.205326                  |
| V1 TG/HDL                                                                                                                                                        | 0.079659  | -0.026098 | 0.160624  | -0.072428 | -0.165971 | 0.178894         | 0.022260                 | 0.057470            | -0.087516                  |
| V1 non-HDL-c                                                                                                                                                     | -0.097574 | -0.122864 | -0.069591 | -0.059484 | -0.168169 | -0.044565        | -0.075497                | -0.049491           | -0.177625                  |
| V1 LDL-c                                                                                                                                                         | -0.126316 | -0.120944 | -0.119775 | -0.038991 | -0.129431 | -0.098730        | -0.072403                | -0.067617           | -0.180817                  |
| V1 cholesterol                                                                                                                                                   | -0.181651 | -0.151977 | -0.148844 | -0.075907 | -0.139090 | -0.114408        | -0.123190                | -0.122772           | -0.226100                  |
| HSI                                                                                                                                                              | -0.066705 | -0.003148 | 0.082767  | 0.036478  | -0.129964 | -0.020390        | -0.057335                | -0.051853           | -0.122341                  |

|                  | Aggregate Results<br>Correlations (Spreadsheet2_(Recovered) 5.01.2024)<br>Marked correlations are significant at p < .05000 |           |           |           |           |           |                  |                          |                     |                            |
|------------------|-----------------------------------------------------------------------------------------------------------------------------|-----------|-----------|-----------|-----------|-----------|------------------|--------------------------|---------------------|----------------------------|
|                  | Probiotic/placebo                                                                                                           | V1 MADRS  | V1 DASS   | V1 D-DASS | V1 A-DASS | V1 S-DASS | V1 MADRS sadness | V1 MADRS neurovegetative | V1 MADRS detachment | V1 MADRS negative thoughts |
| Variable         |                                                                                                                             |           |           |           |           |           |                  |                          |                     |                            |
| V1 BMI [kg/m2]   | plc                                                                                                                         | 0.114476  | 0.191927  | 0.341678  | 0.176365  | -0.026423 | 0.091110         | 0.152837                 | 0.034062            | 0.020174                   |
| V1 WC [cm]       | plc                                                                                                                         | 0.136540  | 0.187850  | 0.320759  | 0.205906  | -0.042009 | 0.128560         | 0.125809                 | 0.162205            | -0.093183                  |
| V1 AST           | plc                                                                                                                         | 0.219025  | -0.053149 | 0.034452  | -0.129984 | -0.042217 | 0.244923         | 0.012607                 | 0.105300            | 0.263112                   |
| V1 ALT           | plc                                                                                                                         | 0.222862  | -0.016192 | 0.108850  | -0.067545 | -0.079957 | 0.253056         | 0.030347                 | 0.165906            | 0.159047                   |
| AST/ALT          | plc                                                                                                                         | 0.219025  | -0.053149 | 0.034452  | -0.129984 | -0.042217 | 0.244923         | 0.012607                 | 0.105300            | 0.263112                   |
| V1 sBP [mmHg]    | plc                                                                                                                         | 0.253218  | 0.173911  | 0.248669  | 0.107476  | 0.077946  | 0.112728         | 0.207824                 | 0.165201            | 0.211281                   |
| V1 dBP [mmHg]    | plc                                                                                                                         | 0.422146  | 0.188623  | 0.295621  | 0.231987  | -0.039475 | 0.355978         | 0.252578                 | 0.209669            | 0.346663                   |
| V1 fGlc [mmol/l] | plc                                                                                                                         | 0.280448  | 0.066791  | 0.159928  | 0.161648  | -0.134115 | 0.129420         | 0.268383                 | 0.226251            | 0.118028                   |
| V1 TG            | plc                                                                                                                         | 0.108823  | 0.009373  | 0.207943  | -0.043727 | -0.133495 | 0.134614         | 0.170869                 | 0.032624            | -0.078081                  |
| V1 TG [mg/dl]    | plc                                                                                                                         | 0.108823  | 0.009373  | 0.207943  | -0.043727 | -0.133495 | 0.134614         | 0.170869                 | 0.032624            | -0.078081                  |
| V1 HDL [mmol/l]  | plc                                                                                                                         | -0.357858 | -0.121098 | -0.272136 | -0.103294 | 0.062249  | -0.302135        | -0.302886                | -0.145895           | -0.218930                  |
| V1 TG/HDL        | plc                                                                                                                         | 0.215484  | 0.034067  | 0.248257  | -0.028947 | -0.126658 | 0.241164         | 0.234295                 | 0.081186            | -0.005702                  |
| V1 non-HDL-c     | plc                                                                                                                         | -0.215075 | -0.184826 | -0.046783 | -0.124078 | -0.276187 | -0.212940        | -0.003539                | -0.109350           | -0.298117                  |
| V1 LDL-c         | plc                                                                                                                         | -0.283154 | -0.205731 | -0.114430 | -0.117644 | -0.267272 | -0.287381        | -0.080445                | -0.114571           | -0.322713                  |
| V1 cholesterol   | plc                                                                                                                         | -0.298031 | -0.209504 | -0.113405 | -0.146145 | -0.252257 | -0.282030        | -0.079159                | -0.142514           | -0.343823                  |
| HSI              | plc                                                                                                                         | 0.085528  | 0.131121  | 0.256009  | 0.149663  | -0.064278 | 0.053676         | 0.115415                 | 0.066596            | -0.023959                  |

| Aggregate Results<br>Correlations (Spreadsheet2_(Recovered) 5.01.2024)<br>Marked correlations are significant at p < .05000 |                   |           |           |           |           |           |                  |                          |                     |                            |
|-----------------------------------------------------------------------------------------------------------------------------|-------------------|-----------|-----------|-----------|-----------|-----------|------------------|--------------------------|---------------------|----------------------------|
|                                                                                                                             | Probiotic/placebo | V1 MADRS  | V1 DASS   | V1 D-DASS | V1 A-DASS | V1 S-DASS | V1 MADRS sadness | V1 MADRS neurovegetative | V1 MADRS detachment | V1 MADRS negative thoughts |
| Variable                                                                                                                    |                   |           |           |           |           |           |                  |                          |                     |                            |
| V1 BMI [kg/m2]                                                                                                              | pro               | -0.081995 | -0.102457 | 0.004929  | -0.033122 | -0.232958 | -0.063713        | -0.152071                | -0.039495           | -0.154865                  |
| V1 WC [cm]                                                                                                                  | pro               | -0.089180 | -0.112694 | -0.053832 | -0.008746 | -0.214096 | -0.085651        | -0.241847                | -0.011875           | -0.162108                  |
| V1 AST                                                                                                                      | pro               | -0.108573 | -0.361053 | -0.353310 | -0.242727 | -0.253639 | 0.037959         | -0.061266                | -0.107158           | -0.182698                  |
| V1 ALT                                                                                                                      | pro               | -0.226538 | -0.286130 | -0.270664 | -0.170805 | -0.233942 | -0.042649        | -0.165719                | -0.271218           | -0.219937                  |
| AST/ALT                                                                                                                     | pro               | -0.108573 | -0.361053 | -0.353310 | -0.242727 | -0.253639 | 0.037959         | -0.061266                | -0.107158           | -0.182698                  |
| V1 sBP [mmHg]                                                                                                               | pro               | -0.021576 | -0.336391 | -0.226296 | -0.189498 | -0.395468 | 0.045260         | -0.158604                | -0.115235           | 0.018316                   |
| V1 dBP [mmHg]                                                                                                               | pro               | 0.036963  | -0.129068 | -0.083320 | -0.048385 | -0.180579 | 0.039897         | -0.136189                | 0.030738            | 0.095226                   |
| V1 fGlc [mmol/l]                                                                                                            | pro               | 0.113218  | -0.060743 | 0.066616  | -0.107345 | -0.124593 | 0.048404         | 0.065970                 | 0.044054            | -0.057923                  |
| V1 TG                                                                                                                       | pro               | -0.081926 | -0.104991 | 0.026339  | -0.124145 | -0.172401 | 0.074333         | -0.225562                | 0.008430            | -0.239500                  |
| V1 TG [mg/dl]                                                                                                               | pro               | -0.081926 | -0.104991 | 0.026339  | -0.124145 | -0.172401 | 0.074333         | -0.225562                | 0.008430            | -0.239500                  |
| V1 HDL [mmol/l]                                                                                                             | pro               | -0.319284 | -0.125387 | -0.271741 | -0.067484 | 0.071525  | -0.226607        | -0.212274                | -0.300303           | -0.196741                  |
| V1 TG/HDL                                                                                                                   | pro               | 0.002330  | -0.083883 | 0.085087  | -0.102148 | -0.210650 | 0.123666         | -0.089061                | 0.031465            | -0.163709                  |
| V1 non-HDL-c                                                                                                                | pro               | -0.029825 | -0.062889 | -0.075753 | -0.011640 | -0.058429 | 0.116512         | -0.165255                | 0.002294            | -0.066664                  |
| V1 LDL-c                                                                                                                    | pro               | -0.037283 | -0.036686 | -0.107353 | 0.018559  | 0.015059  | 0.084339         | -0.124560                | -0.019147           | -0.046584                  |
| V1 cholesterol                                                                                                              | pro               | -0.130203 | -0.097540 | -0.156490 | -0.032359 | -0.029876 | 0.032443         | -0.218440                | -0.094943           | -0.124017                  |
| HSI                                                                                                                         | pro               | -0.165620 | -0.131663 | -0.064824 | -0.054988 | -0.202405 | -0.093020        | -0.156403                | -0.149414           | -0.218060                  |



#### 4. Correlation analysis of basal psychopathological data.

| All Groups<br>Correlations (Spreadsheet2_(Recovered) 5.01.2024)<br>Marked correlations are significant at p < .05000<br>N=87 (Casewise deletion of missing data) |          |          |           |           |           |                  |                          |                     |                            |
|------------------------------------------------------------------------------------------------------------------------------------------------------------------|----------|----------|-----------|-----------|-----------|------------------|--------------------------|---------------------|----------------------------|
| Variable                                                                                                                                                         | V1 MADRS | V1 DASS  | V1 D-DASS | V1 A-DASS | V1 S-DASS | V1 MADRS sadness | V1 MADRS neurovegetative | V1 MADRS detachment | V1 MADRS negative thoughts |
| V1 MADRS                                                                                                                                                         | 1.000000 | 0.547920 | 0.551889  | 0.499183  | 0.273044  | 0.694281         | 0.654911                 | 0.639394            | 0.744665                   |
| V1 DASS                                                                                                                                                          | 0.547920 | 1.000000 | 0.793989  | 0.837984  | 0.793827  | 0.333501         | 0.357401                 | 0.478539            | 0.417237                   |
| V1 D-DASS                                                                                                                                                        | 0.551889 | 0.793989 | 1.000000  | 0.509611  | 0.383852  | 0.433582         | 0.268519                 | 0.442875            | 0.478631                   |
| V1 A-DASS                                                                                                                                                        | 0.499183 | 0.837984 | 0.509611  | 1.000000  | 0.550636  | 0.290668         | 0.378021                 | 0.410211            | 0.341394                   |
| V1 S-DASS                                                                                                                                                        | 0.273044 | 0.793827 | 0.383852  | 0.550636  | 1.000000  | 0.074738         | 0.226052                 | 0.304316            | 0.182297                   |
| V1 MADRS sadness                                                                                                                                                 | 0.694281 | 0.333501 | 0.433582  | 0.290668  | 0.074738  | 1.000000         | 0.270668                 | 0.309083            | 0.479207                   |
| V1 MADRS neurovegetative                                                                                                                                         | 0.654911 | 0.357401 | 0.268519  | 0.378021  | 0.226052  | 0.270668         | 1.000000                 | 0.129046            | 0.411684                   |
| V1 MADRS detachment                                                                                                                                              | 0.639394 | 0.478539 | 0.442875  | 0.410211  | 0.304316  | 0.309083         | 0.129046                 | 1.000000            | 0.276887                   |
| V1 MADRS negative thoughts                                                                                                                                       | 0.744665 | 0.417237 | 0.478631  | 0.341394  | 0.182297  | 0.479207         | 0.411684                 | 0.276887            | 1.000000                   |

| Aggregate Results<br>Correlations (Spreadsheet2_(Recovered) 5.01.2024)<br>Marked correlations are significant at p < .05000 |                   |          |          |           |           |           |                  |                          |                     |                            |
|-----------------------------------------------------------------------------------------------------------------------------|-------------------|----------|----------|-----------|-----------|-----------|------------------|--------------------------|---------------------|----------------------------|
| Variable                                                                                                                    | Probiotic/placebo | V1 MADRS | V1 DASS  | V1 D-DASS | V1 A-DASS | V1 S-DASS | V1 MADRS sadness | V1 MADRS neurovegetative | V1 MADRS detachment | V1 MADRS negative thoughts |
| V1 MADRS                                                                                                                    | plc               | 1.000000 | 0.488648 | 0.533878  | 0.444783  | 0.248330  | 0.772216         | 0.674943                 | 0.583366            | 0.693911                   |
| V1 DASS                                                                                                                     | plc               | 0.488648 | 1.000000 | 0.800666  | 0.845093  | 0.835563  | 0.304479         | 0.325774                 | 0.327545            | 0.381852                   |
| V1 D-DASS                                                                                                                   | plc               | 0.533878 | 0.800666 | 1.000000  | 0.538677  | 0.455306  | 0.384502         | 0.387079                 | 0.246976            | 0.459478                   |
| V1 A-DASS                                                                                                                   | plc               | 0.444783 | 0.845093 | 0.538677  | 1.000000  | 0.586659  | 0.271823         | 0.238180                 | 0.441911            | 0.235511                   |
| V1 S-DASS                                                                                                                   | plc               | 0.248330 | 0.835563 | 0.455306  | 0.586659  | 1.000000  | 0.111226         | 0.187176                 | 0.144879            | 0.251860                   |
| V1 MADRS sadness                                                                                                            | plc               | 0.772216 | 0.304479 | 0.384502  | 0.271823  | 0.111226  | 1.000000         | 0.359433                 | 0.346940            | 0.363335                   |
| V1 MADRS neuroc                                                                                                             | plc               | 0.674943 | 0.325774 | 0.387079  | 0.238180  | 0.187176  | 0.359433         | 1.000000                 | -0.001203           | 0.496760                   |
| V1 MADRS detach                                                                                                             | plc               | 0.583366 | 0.327545 | 0.246976  | 0.441911  | 0.144879  | 0.346940         | -0.001203                | 1.000000            | 0.163394                   |
| V1 MADRS negat                                                                                                              | plc               | 0.693911 | 0.381852 | 0.459478  | 0.235511  | 0.251860  | 0.363335         | 0.496760                 | 0.163394            | 1.000000                   |
| V1 MADRS                                                                                                                    | pro               | 1.000000 | 0.603920 | 0.579986  | 0.536190  | 0.305137  | 0.656814         | 0.647747                 | 0.683968            | 0.797827                   |
| V1 DASS                                                                                                                     | pro               | 0.603920 | 1.000000 | 0.793308  | 0.837565  | 0.754331  | 0.362633         | 0.415715                 | 0.588406            | 0.447192                   |
| V1 D-DASS                                                                                                                   | pro               | 0.579986 | 0.793308 | 1.000000  | 0.499319  | 0.326634  | 0.483022         | 0.242507                 | 0.556579            | 0.493837                   |
| V1 A-DASS                                                                                                                   | pro               | 0.536190 | 0.837565 | 0.499319  | 1.000000  | 0.524588  | 0.309046         | 0.476481                 | 0.398990            | 0.432959                   |
| V1 S-DASS                                                                                                                   | pro               | 0.305137 | 0.754331 | 0.326634  | 0.524588  | 1.000000  | 0.036592         | 0.286837                 | 0.432656            | 0.113191                   |
| V1 MADRS sadness                                                                                                            | pro               | 0.656814 | 0.362633 | 0.483022  | 0.309046  | 0.036592  | 1.000000         | 0.218261                 | 0.288966            | 0.591568                   |
| V1 MADRS neuroc                                                                                                             | pro               | 0.647747 | 0.415715 | 0.242507  | 0.476481  | 0.286837  | 0.218261         | 1.000000                 | 0.237074            | 0.388558                   |
| V1 MADRS detach                                                                                                             | pro               | 0.683968 | 0.588406 | 0.556579  | 0.398990  | 0.432656  | 0.288966         | 0.237074                 | 1.000000            | 0.356643                   |
| V1 MADRS negat                                                                                                              | pro               | 0.797827 | 0.447192 | 0.493837  | 0.432959  | 0.113191  | 0.591568         | 0.388558                 | 0.356643            | 1.000000                   |
